# Supplementary material
Source: publisher figshare collection journal article supplement (https://frontiersin.figshare.com/ndownloader/files/34118406)

Supplementary Figure 1. Occurrence of NTDs by embryonic sex in VPA-treated SWV.

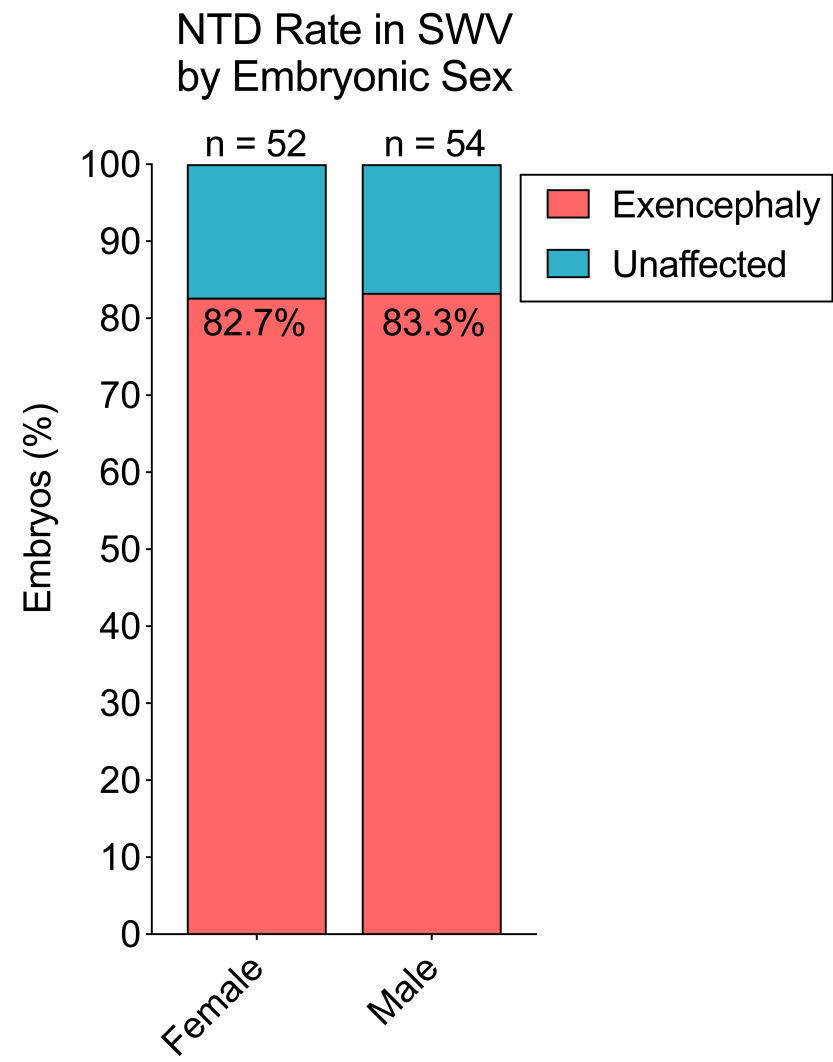

Supplementary Figure 2. Number of increased and decreased MDAs in each super and sub pathway classification.

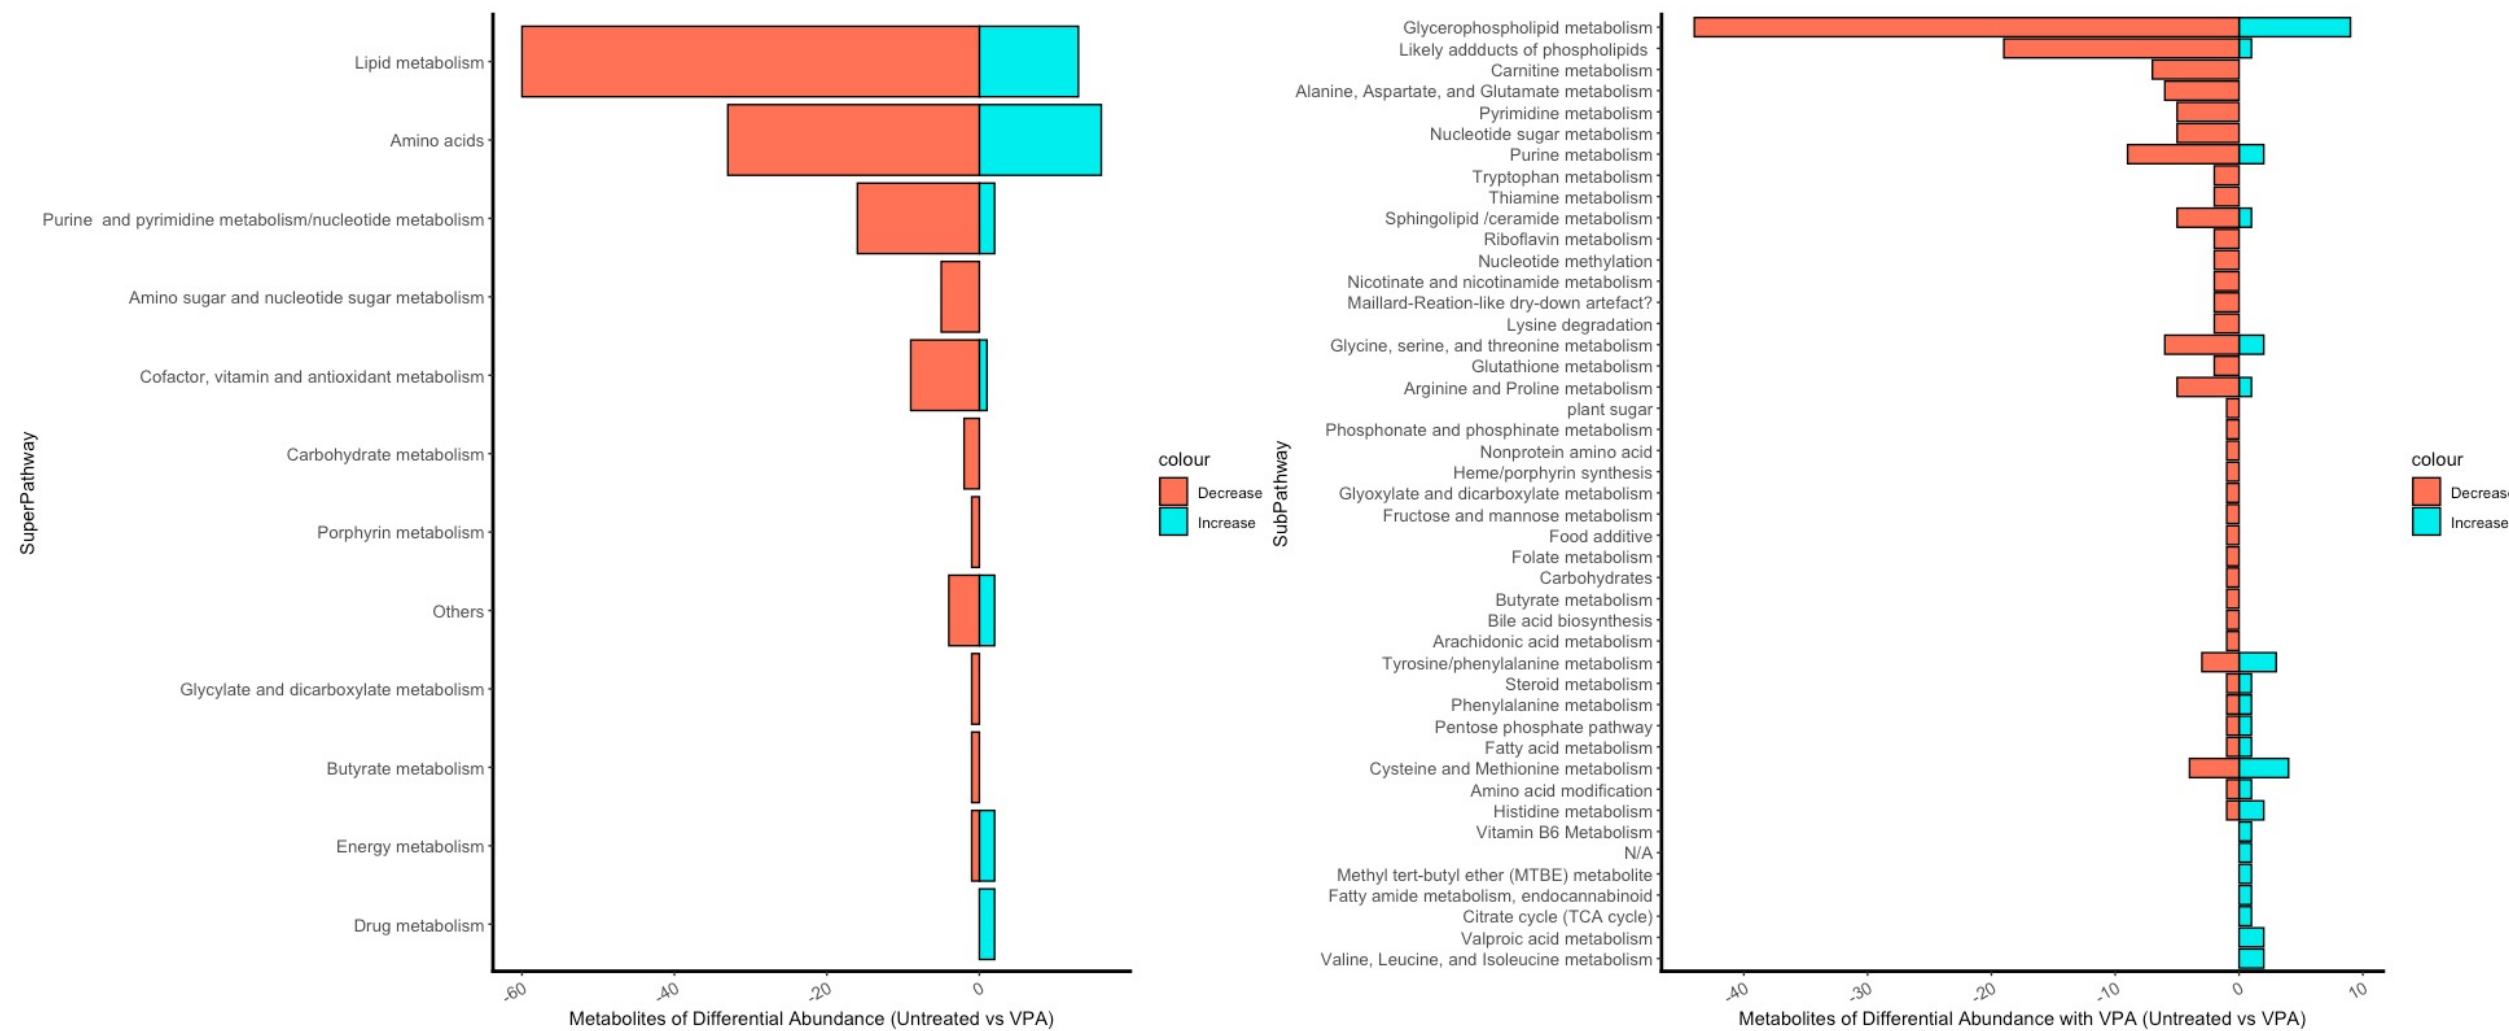

**Supplementary Figure 3. Abundance of metabolites involved in the methylation cycle and the SAM/SAH ratio.**

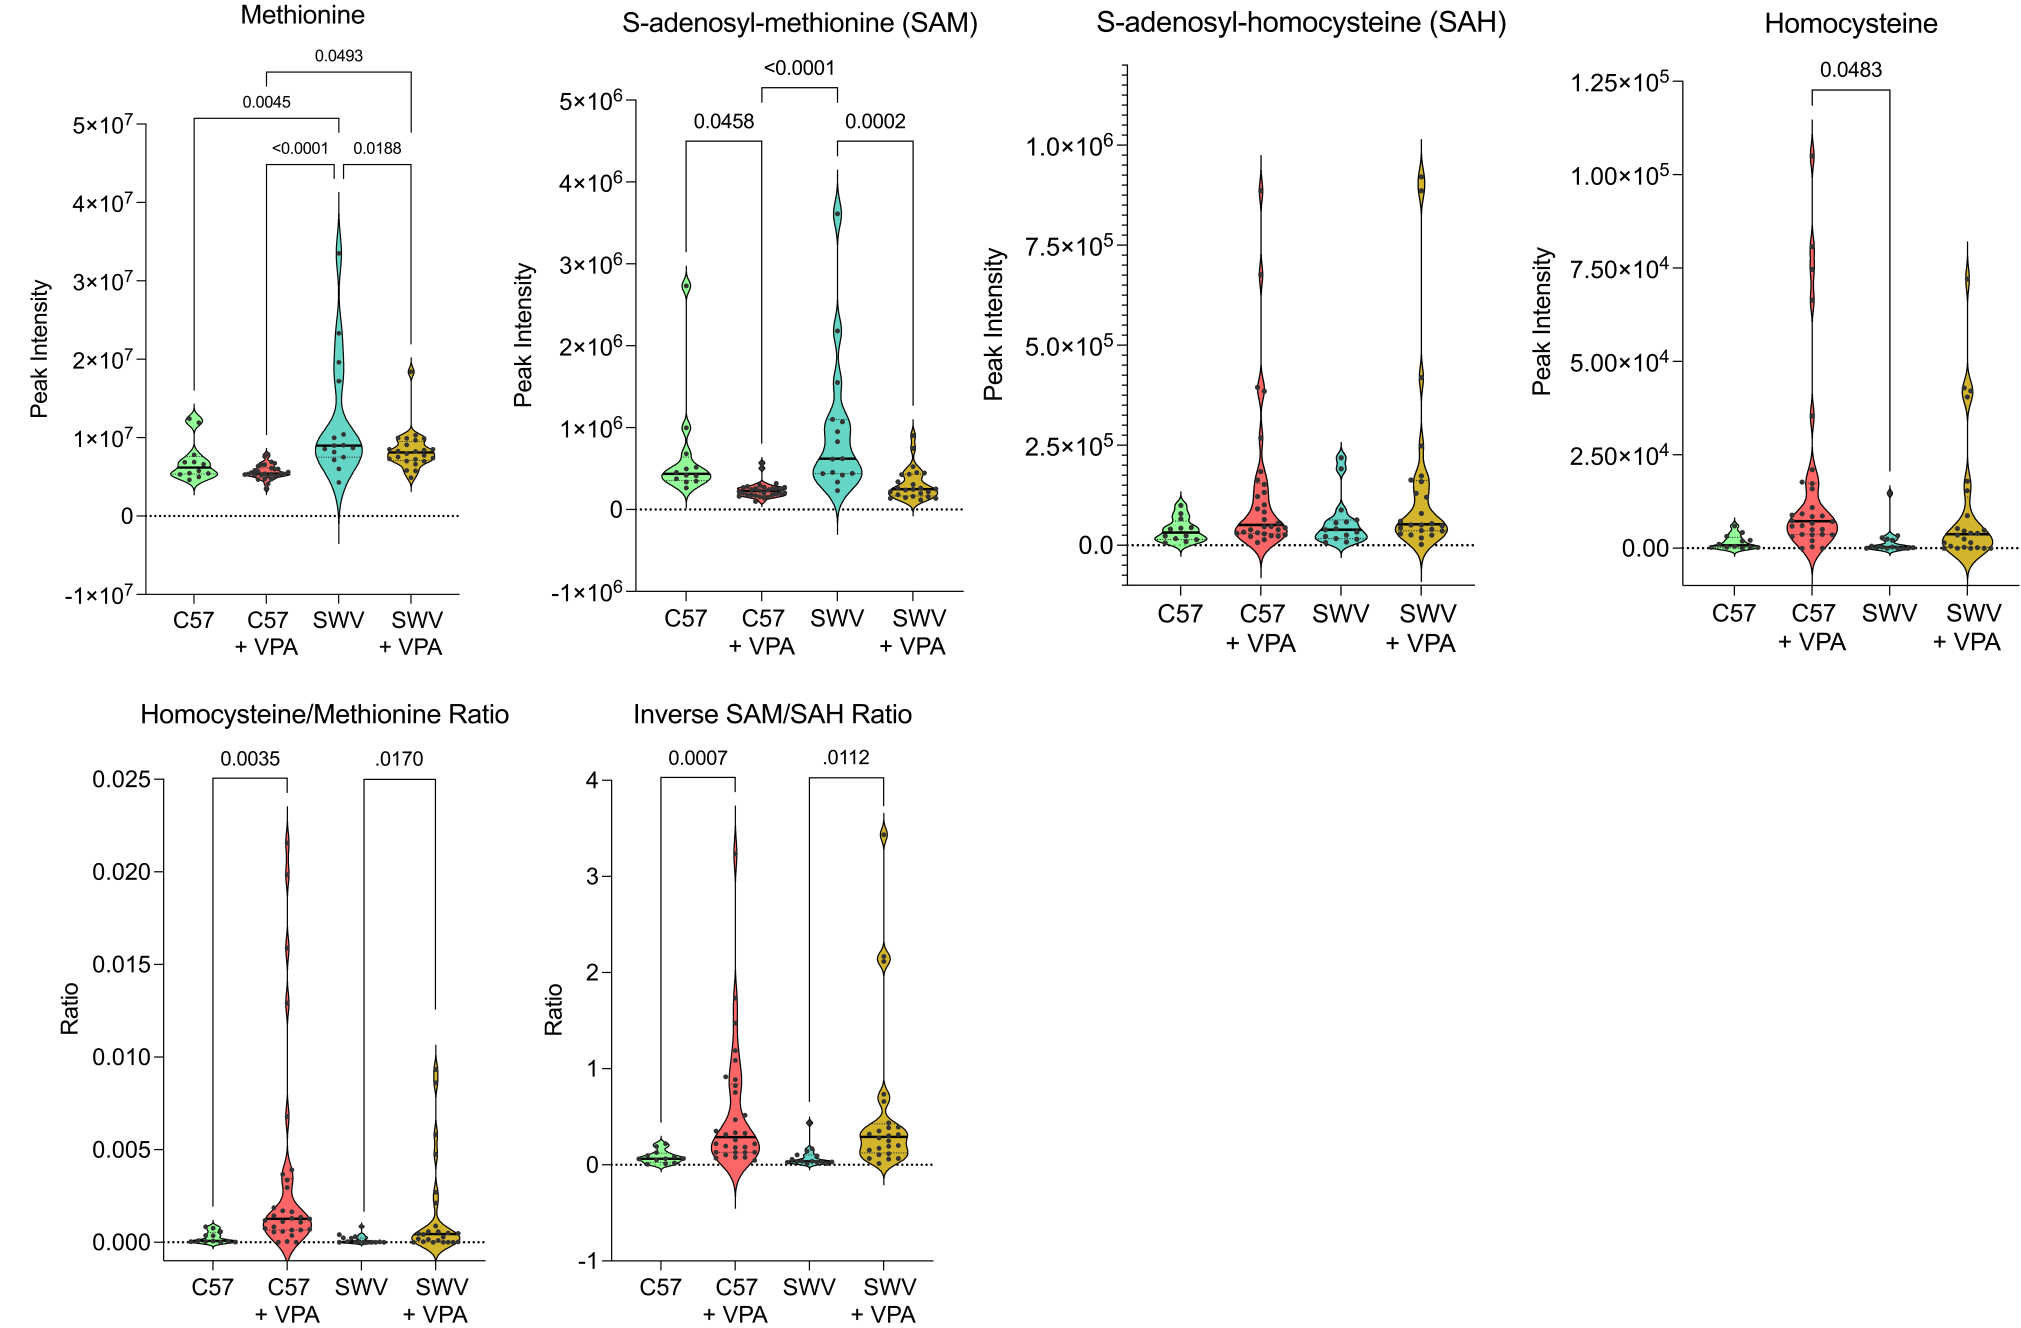

Supplementary Figure 4. Ratio of oxidized glutathione to reduced glutathione.

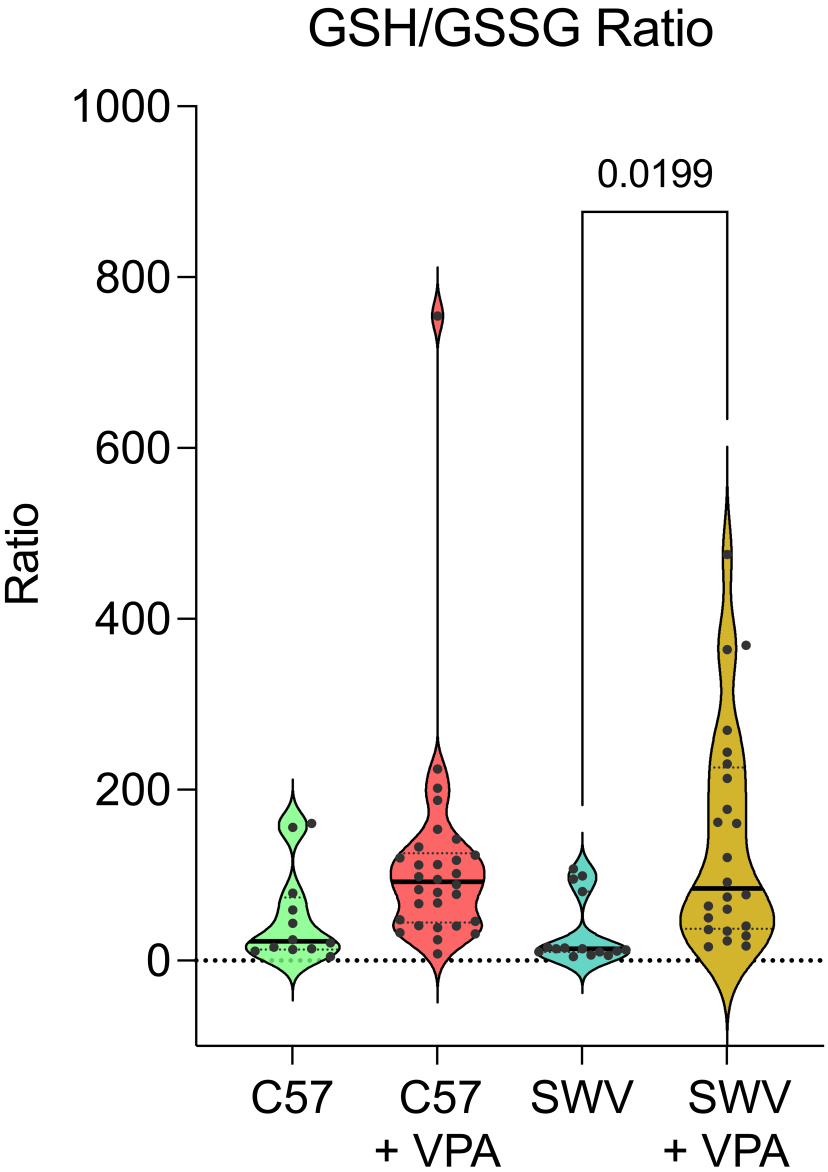



Supplementary Figure 5. Carnitine abundance in embryos.

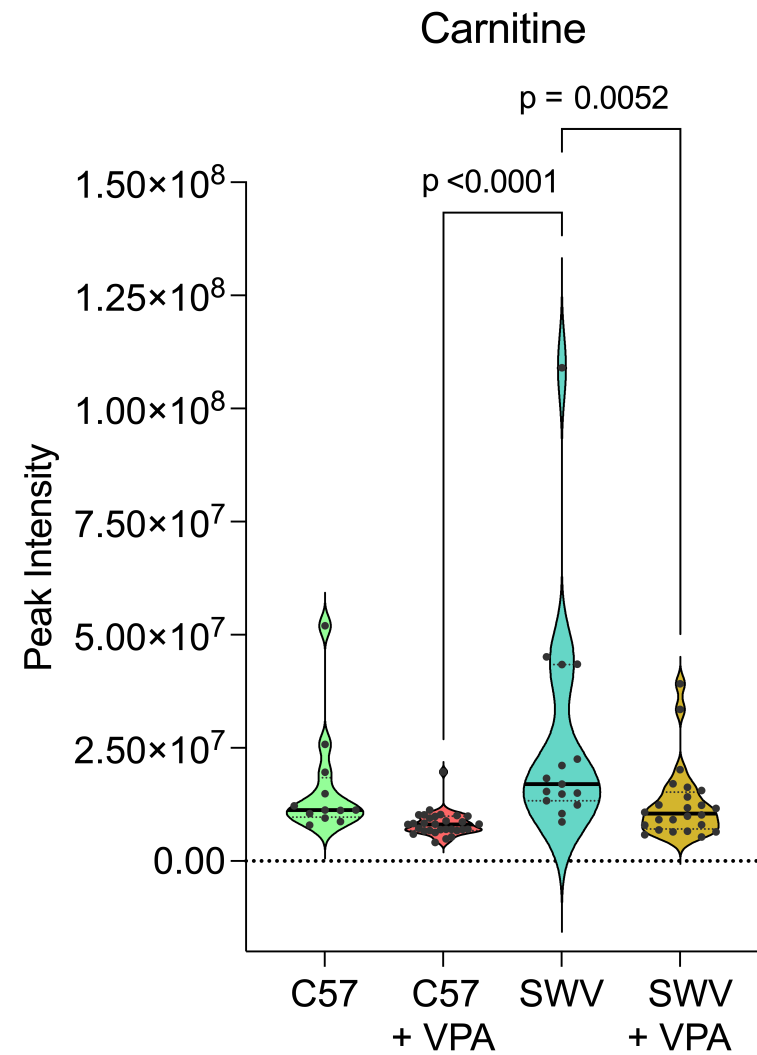

Supplement: Supplementary file [file 34118406]
